# Supplementary material for: Spinal myxopapillary ependymomas: a retrospective clinical and immunohistochemical study
Source: Springer Nature journal article supplement (doi:10.1007/s00701-015-2637-8), 2015-11-16
Supplement: MOESM1 [file 8634854]

| Patient No. | 1 | 2 | 3 | 4 | 5 | 6 |
| --- | --- | --- | --- | --- | --- | --- |
| Date of  diagnose | Jan/2004 | Sep/2004 | Jun/2005 | Jan/2006 | Aug/2007 | Aug/2007 |
| Age  (years) | 7 | 31 | 57 | 55 | 42 | 47 |
| Gender F/M | M | F | M | F | F | M |
| Symptoms | RUL weakness & numbness; gait impariment | pain in back; LLs weakness & numbness | LLs numbness & paralysis | pain in buttocks and LLs | pain in bottocks | LLL numbness; bladder & bowel difficulties; gait impairment |
| Tumor location | C1-T7 | L2-4 | T11-L2 | L2-S2 | T11-L2 | T12-L3 |
| Extent of surgery | GTR | STR | STR | STR | GTR | STR |
| Operational  complica- tions | N/A | N/A | pain in LLs | urinary incontinence | N/A | LLs paralysis |
| Time of  recurrence(mons) | 17 | N/A | 83 | N/A | N/A | 36 |
| Recurrence | Yes | No | Yes | No | No | Yes |
| Follow-up time (mons) | 17 | 122 | 113 | 106 | 87 | 87 |
| PDGFR-α | + | + | + | + | + | + |
| EGFR | - | + | - | - | - | - |
| MMP14 | + | + | + | + | + | + |
| MMP2 | + | + | + | + | + | + |

LLs: lower limbs; LLL: left lower limb; RLL: right lower limb; RUL: right upper limb

| Patient No. | 7 | 8 | 9 | 10 | 11 | 12 |
| --- | --- | --- | --- | --- | --- | --- |
| Date of  diagnose | Dec/2007 | Jan/2008 | Jan/2010 | Feb/2010 | Mar/2010 | Mar/2010 |
| Age  (years) | 14 | 47 | 22 | 32 | 12 | 42 |
| Gender F/M | M | M | F | F | M | M |
| Symptoms | pain in back | pain and numbness in back & LLs; gait impairment bladder & bowel difficulties; sexual dysfunction | pain in back | LLs pain & numbness & weakness; bladder & bowel  difficulties | pain in bottocks and LLL | LLs weakness; bowel difficulty |
| Tumor location | L5-S3 | T12-L1 | L2 | L2-4 | L1-2 | L2-3 |
| Extent of surgery | GTR | STR | GTR | GTR | GTR | STR |
| Operational  complica- tions | N/A | N/A | N/A | N/A | N/A | N/A |
| Time of  recurrence(mons) | N/A | N/A | N/A | N/A | N/A | N/A |
| Recurrence | No | No | No | No | No | No |
| Follow-up time (mons) | 83 | 82 | 58 | 57 | 56 | 56 |
| PDGFR-α | + | + | + | + | + | + |
| EGFR | - | - | + | + | - | - |
| MMP14 | + | + | + | + | + | - |
| MMP2 | + | + | + | + | + | + |

LLs: lower limbs; LLL: left lower limb; RLL: right lower limb; RUL: right upper limb

| Patient No. | 13 | 14 | 15 | 16 | 17 | 18 |
| --- | --- | --- | --- | --- | --- | --- |
| Date of  diagnose | May/2010 | Jun/2010 | Sep/2010 | Jun/2011 | Dec/2011 | Feb/2012 |
| Age  (years) | 50 | 27 | 37 | 26 | 14 | 29 |
| Gender F/M | F | M | F | F | F | M |
| Symptoms | LLL pain & numbness & weakness; gait impairment | pain in LLs and buttocks; bladder & bowel  difficulties | LLs pain & numbness & weakness | RLL numbness | pain in back; bowel difficulty | pain in back; gait impairment |
| Tumor location | L1-2 | L1-4 | L1-3 | L2-3 | L2-S1 | L5-S1 |
| Extent of surgery | GTR | GTR | GTR | GTR | GTR | STR |
| Operational  complica- tions | N/A | N/A | N/A | N/A | N/A | N/A |
| Time of  recurrence(mons) | N/A | N/A | N/A | N/A | N/A | N/A |
| Recurrence | No | No | No | No | No | No |
| Follow-up time (mons) | 54 | 53 | 50 | 46 | 35 | 33 |
| PDGFR-α | + | + | + | + | + | + |
| EGFR | + | - | - | - | + | + |
| MMP14 | + | + | + | + | + | + |
| MMP2 | + | + | + | + | + | + |

LLs: lower limbs; LLL: left lower limb; RLL: right lower limb; RUL: right upper limb

| Patient No. | 19 | 20 | 21 | 22 | 23 | 24 |
| --- | --- | --- | --- | --- | --- | --- |
| Date of  diagnose | Oct/2012 | Dec/2012 | Jun/2013 | Aug/2013 | Aug/2013 | Aug/2013 |
| Age  (years) | 11 | 20 | 37 | 44 | 26 | 45 |
| Gender F/M | F | M | F | M | F | M |
| Symptoms | pain in back | pain in back | LLs pain & numbness & weakness; bladder & bowel  difficulties | pain in RLL | pain in LLL | LLL weakness; RLL numbness |
| Tumor location | L2 | L2 | T12-L2 | L1-S1 | L3 | L1-5 |
| Extent of surgery | GTR | GTR | GTR(RT) | STR | GTR | GTR |
| Operational  complica- tions | N/A | N/A | N/A | fecal incontinence | N/A | bladder & bowel ifficulties |
| Time of  recurrence(mons) | 5 | N/A | N/A | N/A | N/A | N/A |
| Recurrence | Yes | No | No | No | No | No |
| Follow-up time (mons) | 25 | 23 | 17 | 15 | 15 | 15 |
| PDGFR-α | + | + | + | + | + | + |
| EGFR | - | - | - | - | - | + |
| MMP14 | + | + | + | + | + | + |
| MMP2 | + | + | + | + | + | + |

LLs: lower limbs; LLL: left lower limb; RLL: right lower limb; RUL: right upper limb

| Patient No. | 25 | 26 | 27 |
| --- | --- | --- | --- |
| Date of  diagnose | Sep/2013 | Oct/2013 | Oct/2013 |
| Age  (years) | 47 | 25 | 34 |
| Gender F/M | F | M | F |
| Symptoms | pain in back & RLL | pain in back | pain in back & LLs; bladder & bowel  difficulties |
| Tumor location | L2-3 | L1-2 | L5-S1 |
| Extent of surgery | GTR | GTR | STR |
| Operational  complica- tions | N/A | N/A | perineal numbness; bladder & bowel difficulties |
| Time of  recurrence(mons) | N/A | N/A | N/A |
| Recurrence | No | No | No |
| Follow-up time (mons) | 14 | 13 | 13 |
| PDGFR-α | + | + | + |
| EGFR | - | - | - |
| MMP14 | + | + | + |
| MMP2 | + | + | + |

LLs: lower limbs; LLL: left lower limb; RLL: right lower limb; RUL: right upper limb
